# Supplementary material
Source: MDPI journal article supplement (https://www.mdpi.com/2079-6412/12/10/1591)
Supplement: s1 [file s1]

# Supplementary Materials: Modification of Shellac with Clove (*Eugenia caryophyllata*) and Thyme (*Satureja hortensis*) Essential Oils: Compatibility Issues and Effect on the UV Light Resistance of Wood-Coated Surfaces

Maria Cristina Timar \* and Emanuela Carmen Beldean

Faculty of Furniture Design and Wood Engineering, Transilvania University of Braşov,  
500036 Braşov, Romania

\* Correspondence: cristinatimar@unitbv.ro

**Citation:** Timar, M.C.; Beldean, E.C. Modification of Shellac with Clove (*Eugenia caryophyllata*) and Thyme (*Satureja hortensis*) Essential Oils: Compatibility Issues and Effect on the UV Light Resistance of Wood-Coated Surfaces. *Coatings* **2022**, *12*, 1591. <https://doi.org/10.3390/coatings12101591>

Academic Editor: Mariaenrica Frigione

Received: 28 August 2022

Accepted: 18 October 2022

Published: 20 October 2022

**Publisher's Note:** MDPI stays neutral with regard to jurisdictional claims in published maps and institutional affiliations.

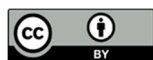

**Copyright:** © 2022 by the author. Licensee MDPI, Basel, Switzerland. This article is an open access article distributed under the terms and conditions of the Creative Commons Attribution (CC BY) license (<https://creativecommons.org/licenses/by/4.0/>).

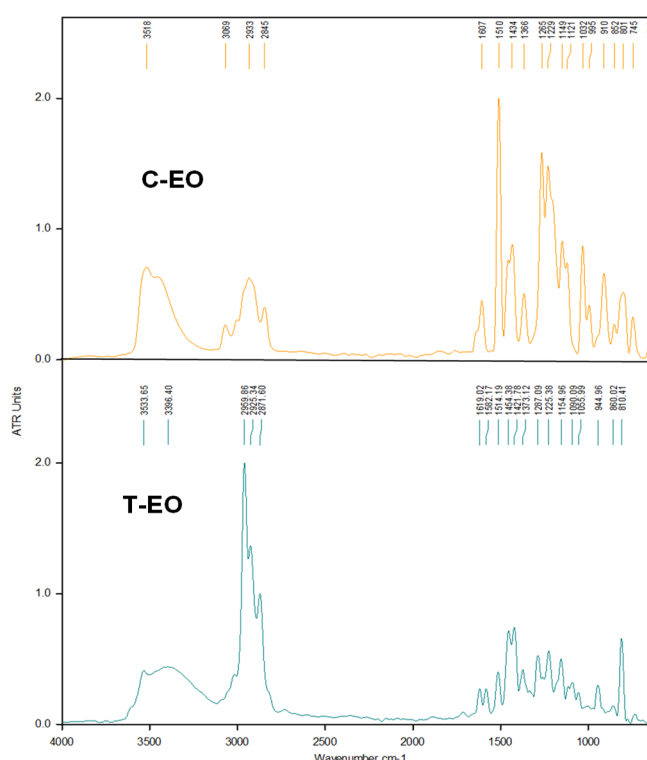

**Figure S1.** Comparative FTIR–ATR spectra of clove (*Eugenia carryophyllata*) and thyme (*Satureja hortensis*) essential oils (C-EO, T-EO) employed in the experimental research.
